# Supplementary material
Source: PubMed Central journal article supplement (PMC5244290)

Table S1. Sampling point descriptions

| Sampling sites | Locations                     | Major land used and activities around sampling sites | Population (by 2014) |
|----------------|-------------------------------|------------------------------------------------------|----------------------|
| Muan (MA)      | 35° 6'17.45"N, 126°19'55.16"E | Agriculture, tidal tourism                           | 81,192               |
| Mokpo (MP)     | 34°51'45.91"N, 126°19'10.84"E | Agriculture, fishery                                 | 239,026              |
| Haenam (HN)    | 34°24'49.79"N, 126°30'57.79"E | Agriculture, saltern                                 | 77,249               |
| Jangheung (JH) | 34°26'5.54"N, 126°53'6.41"E   | Harbor                                               | 43,190               |
| Boseong (BS)   | 34°48'53.45"N, 127°24'39.58"E | Harbor, agriculture, tidal wetland protected area    | 46,061               |

Table S2. Total number of *Vibrio* isolates collected from tidal water and mud samples

| Sampling season    | <i>Vibrio</i>      | Number of <i>Vibrio</i> spp. isolates (%) at |            |             |                |              | Total number of <i>Vibrio</i> spp. |
|--------------------|--------------------|----------------------------------------------|------------|-------------|----------------|--------------|------------------------------------|
|                    |                    | Muan (MA)                                    | Mokpo (MP) | Haenam (HN) | Jangheung (JH) | Boseong (BS) |                                    |
| <i>Tidal water</i> |                    |                                              |            |             |                |              |                                    |
| Jun. 2013          | Total isolates     | 252                                          | 252        | 252         | 252            | 250          | 1258                               |
|                    | <i>Vibrio</i> spp. | 242 (96.0)                                   | 230 (91.3) | 220 (87.3)  | 244 (96.8)     | 234 (93.6)   | 1170 (93.0)                        |
| Sept. 2013         | Total isolates     | 236                                          | 252        | 252         | 252            | 252          | 1244                               |
|                    | <i>Vibrio</i> spp. | 230 (97.5)                                   | 231 (91.7) | 188 (74.6)  | 224 (88.9)     | 232 (92.1)   | 1105 (88.8)                        |
| Dec. 2013          | Total isolates     | 239                                          | 89         | 252         | 252            | 243          | 1075                               |
|                    | <i>Vibrio</i> spp. | 222 (92.9)                                   | 87 (97.8)  | 229 (90.9)  | 225 (89.3)     | 231 (95.1)   | 994 (92.5)                         |
| Feb. 2014          | Total isolates     | 99                                           | 228        | 172         | 213            | 134          | 846                                |
|                    | <i>Vibrio</i> spp. | 94 (94.9)                                    | 221 (96.9) | 166 (96.5)  | 208 (97.7)     | 132 (98.5)   | 821 (97.0)                         |
| Apr. 2014          | Total isolates     | 197                                          | 249        | 227         | 241            | 242          | 1156                               |
|                    | <i>Vibrio</i> spp. | 193 (98.0)                                   | 249 (100)  | 213 (93.8)  | 240 (99.6)     | 242 (100)    | 1137 (98.4)                        |
| <i>Mud</i>         |                    |                                              |            |             |                |              |                                    |
| Jun. 2013          | Total isolates     | 252                                          | 252        | 252         | 252            | 252          | 1260                               |
|                    | <i>Vibrio</i> spp. | 252 (100)                                    | 252 (100)  | 252 (100)   | 250 (99.2)     | 249 (98.8)   | 1255 (99.6)                        |
| Sept. 2013         | Total isolates     | 252                                          | 252        | 251         | 252            | 252          | 1259                               |
|                    | <i>Vibrio</i> spp. | 226 (89.7)                                   | 214 (84.9) | 207 (82.5)  | 205 (81.3)     | 222 (88.1)   | 1075 (85.3)                        |
| Dec. 2013          | Total isolates     | 252                                          | 252        | 252         | 252            | 252          | 1260                               |
|                    | <i>Vibrio</i> spp. | 230 (91.3)                                   | 206 (81.7) | 226 (89.7)  | 214 (84.9)     | 197 (78.2)   | 1073 (85.2)                        |
| Feb. 2014          | Total isolates     | 232                                          | 193        | 246         | 252            | 248          | 1171                               |
|                    | <i>Vibrio</i> spp. | 228 (98.3)                                   | 189 (97.9) | 242 (98.4)  | 251 (99.6)     | 246 (99.2)   | 1156 (98.7)                        |
| Apr. 2014          | Total isolates     | 252                                          | 236        | 252         | 252            | 251          | 1243                               |
|                    | <i>Vibrio</i> spp. | 238 (94.4)                                   | 229 (97.0) | 243 (96.4)  | 245 (97.2)     | 243 (96.8)   | 1198 (96.4)                        |

Table S3. BLAST results of 16S rRNA sequencing of control strains and randomly selected environmental isolated *Vibrio* strains (NCBI database, <https://blast.ncbi.nlm.nih.gov/Blast.cgi>)

| Isolates      | Strains                                         | Identified species         | Identical (%) | Length (bp) | G+C content (%) |
|---------------|-------------------------------------------------|----------------------------|---------------|-------------|-----------------|
| Control       | <i>Escherichia coli</i> NCCP 13716              | <i>Escherichia coli</i>    | 99            | 1449        | 55.0            |
| Control       | <i>V. alginolyticus</i> KCTC 12696 <sup>T</sup> | <i>V. alginolyticus</i>    | 99            | 1456        | 54.7            |
| Control       | <i>V. cholerae</i> NCCP 11179                   | <i>V. cholerae</i>         | 99            | 1446        | 54.0            |
| Control       | <i>V. parahaemolyticus</i> KCTC 2471            | <i>V. parahaemolyticus</i> | 99            | 1459        | 54.2            |
| Control       | <i>V. vulnificus</i> KCTC 2959 <sup>T</sup>     | <i>V. vulnificus</i>       | 99            | 1445        | 54.5            |
| Environmental | A1                                              | <i>V. alginolyticus</i>    | 99            | 1457        | 54.1            |
| Environmental | A2                                              | <i>V. alginolyticus</i>    | 99            | 1458        | 54.2            |
| Environmental | A3                                              | <i>V. alginolyticus</i>    | 99            | 1455        | 54.2            |
| Environmental | A4                                              | <i>V. alginolyticus</i>    | 99            | 1462        | 54.6            |
| Environmental | A5                                              | <i>V. alginolyticus</i>    | 99            | 1458        | 54.4            |
| Environmental | A6                                              | <i>V. alginolyticus</i>    | 99            | 1459        | 54.1            |
| Environmental | A7                                              | <i>V. alginolyticus</i>    | 99            | 1461        | 54.0            |
| Environmental | A8                                              | <i>V. alginolyticus</i>    | 99            | 1458        | 54.3            |
| Environmental | A9                                              | <i>V. alginolyticus</i>    | 99            | 1455        | 54.3            |
| Environmental | A10                                             | <i>V. alginolyticus</i>    | 99            | 1463        | 54.4            |
| Environmental | C1                                              | <i>V. cholerae</i>         | 97            | 1448        | 53.6            |
| Environmental | C2                                              | <i>V. cholerae</i>         | 97            | 1449        | 53.6            |
| Environmental | C3                                              | <i>V. cholerae</i>         | 99            | 1448        | 54.0            |
| Environmental | C4                                              | <i>V. cholerae</i>         | 99            | 1448        | 54.1            |
| Environmental | C5                                              | <i>V. cholerae</i>         | 99            | 1449        | 53.7            |
| Environmental | C6                                              | <i>V. cholerae</i>         | 99            | 1450        | 53.9            |
| Environmental | C7                                              | <i>V. cholerae</i>         | 98            | 1455        | 53.5            |
| Environmental | C8                                              | <i>V. cholerae</i>         | 99            | 1447        | 54.1            |
| Environmental | C9                                              | <i>V. cholerae</i>         | 99            | 1446        | 54.1            |
| Environmental | C10                                             | <i>V. cholerae</i>         | 99            | 1449        | 54.0            |
| Environmental | P1                                              | <i>V. parahaemolyticus</i> | 99            | 1455        | 54.2            |

|               |     |                                                        |     |      |      |
|---------------|-----|--------------------------------------------------------|-----|------|------|
| Environmental | P2  | <i>V. parahaemolyticus</i>                             | 99  | 1455 | 54.3 |
| Environmental | P3  | <i>V. parahaemolyticus</i>                             | 99  | 1457 | 54.2 |
| Environmental | P4  | <i>V. parahaemolyticus</i>                             | 99  | 1455 | 54.1 |
| Environmental | P5  | <i>V. parahaemolyticus</i>                             | 99  | 1456 | 54.1 |
| Environmental | P6  | <i>V. parahaemolyticus</i>                             | 100 | 1459 | 54.4 |
| Environmental | P7  | <i>V. parahaemolyticus</i>                             | 99  | 1458 | 54.0 |
| Environmental | P8  | <i>V. parahaemolyticus</i>                             | 99  | 1458 | 54.1 |
| Environmental | P9  | <i>V. parahaemolyticus</i>                             | 95  | 1462 | 53.9 |
| Environmental | P10 | <i>V. parahaemolyticus</i>                             | 99  | 1462 | 54.0 |
| Environmental | V1  | <i>V. vulnificus</i>                                   | 99  | 1450 | 54.8 |
| Environmental | V2  | <i>V. vulnificus</i>                                   | 99  | 1453 | 54.7 |
| Environmental | V3  | <i>V. vulnificus</i>                                   | 99  | 1450 | 54.6 |
| Environmental | V4  | <i>V. vulnificus</i>                                   | 99  | 1451 | 54.9 |
| Environmental | V5  | <i>V. vulnificus</i>                                   | 99  | 1452 | 55.0 |
| Environmental | V6  | <i>V. vulnificus</i>                                   | 100 | 1452 | 54.8 |
| Environmental | V7  | <i>V. vulnificus</i>                                   | 99  | 1452 | 54.8 |
| Environmental | V8  | <i>V. vulnificus</i>                                   | 99  | 1449 | 54.8 |
| Environmental | V9  | uncultured Vibrio<br>(Accession number:<br>KP016605.1) | 97  | 1539 | 53.7 |
| Environmental | V10 | <i>V. vulnificus</i>                                   | 99  | 1450 | 54.6 |

---

Table S4. Analysis of Variance (ANOVA) of each environmental parameter to observe the significant differences and variance homogeneity by months and sampling sites

| Environmental parameters                   | ANOVA ( <i>p</i> -value) |              |              |              |
|--------------------------------------------|--------------------------|--------------|--------------|--------------|
|                                            | Months                   |              | Sites        |              |
|                                            | Homogeneity              | Significance | Homogeneity  | Significance |
| <i>Tidal water</i>                         |                          |              |              |              |
| Log <sub>10</sub> MPN                      | <b>0.037</b>             | <b>0.000</b> | 0.969        | 0.967        |
| Temperature (°C)                           | <b>0.043</b>             | <b>0.000</b> | 0.941        | 0.977        |
| pH                                         | 0.389                    | <b>0.009</b> | <b>0.032</b> | 0.379        |
| Electric conductivity (S m <sup>-1</sup> ) | <b>0.012</b>             | <b>0.001</b> | 0.372        | 0.433        |
| Salinity                                   | <b>0.001</b>             | <b>0.005</b> | 0.475        | 0.370        |
| Turbidity (NTU)                            | <b>0.019</b>             | 0.207        | 0.099        | 0.130        |
| BOD (mg L <sup>-1</sup> )                  | <b>0.000</b>             | <b>0.016</b> | 0.490        | 0.928        |
| <i>Mud</i>                                 |                          |              |              |              |
| Log <sub>10</sub> MPN                      | <b>0.001</b>             | <b>0.001</b> | 0.923        | 0.567        |
| Temperature (°C)                           | 0.063                    | <b>0.000</b> | 0.976        | 0.927        |
| pH                                         | 0.452                    | <b>0.000</b> | 0.702        | 0.691        |
| Electric conductivity (S m <sup>-1</sup> ) | 0.121                    | 0.546        | 0.126        | <b>0.000</b> |

\*ANOVA = Analysis of Variance; *p*-value = Significance value; Significant level = 0.05. Significance value are shown in bold (*p*<0.05).

Homogeneity value less than 0.05 showed that the variance are heterogeneous, homogeneity value more than 0.05 showed that the variance are homogeneous.

**Figure S1.** Environmental parameters measured in tidal water in all season (June, September, and December, 2013, February and April, 2014) from five sampling sites (MA: Muan, MP: Mokpo, HN: Haenam, JH: Jangheung, BS: Boseong). (a) temperature, (b) salinity, (c) pH, (d) biological oxygen demand, BOD, (e) electric conductivity, EC, and (f) turbidity.

**Figure S2.** Environmental parameters measured in mud in all season (June, September, and December, 2013, February and April, 2014) from five sampling sites (MA: Muan, MP: Mokpo, HN: Haenam, JH: Jangheung, BS: Boseong). (a) temperature, (b) pH and (c) electric conductivity, EC.

Figure S1.

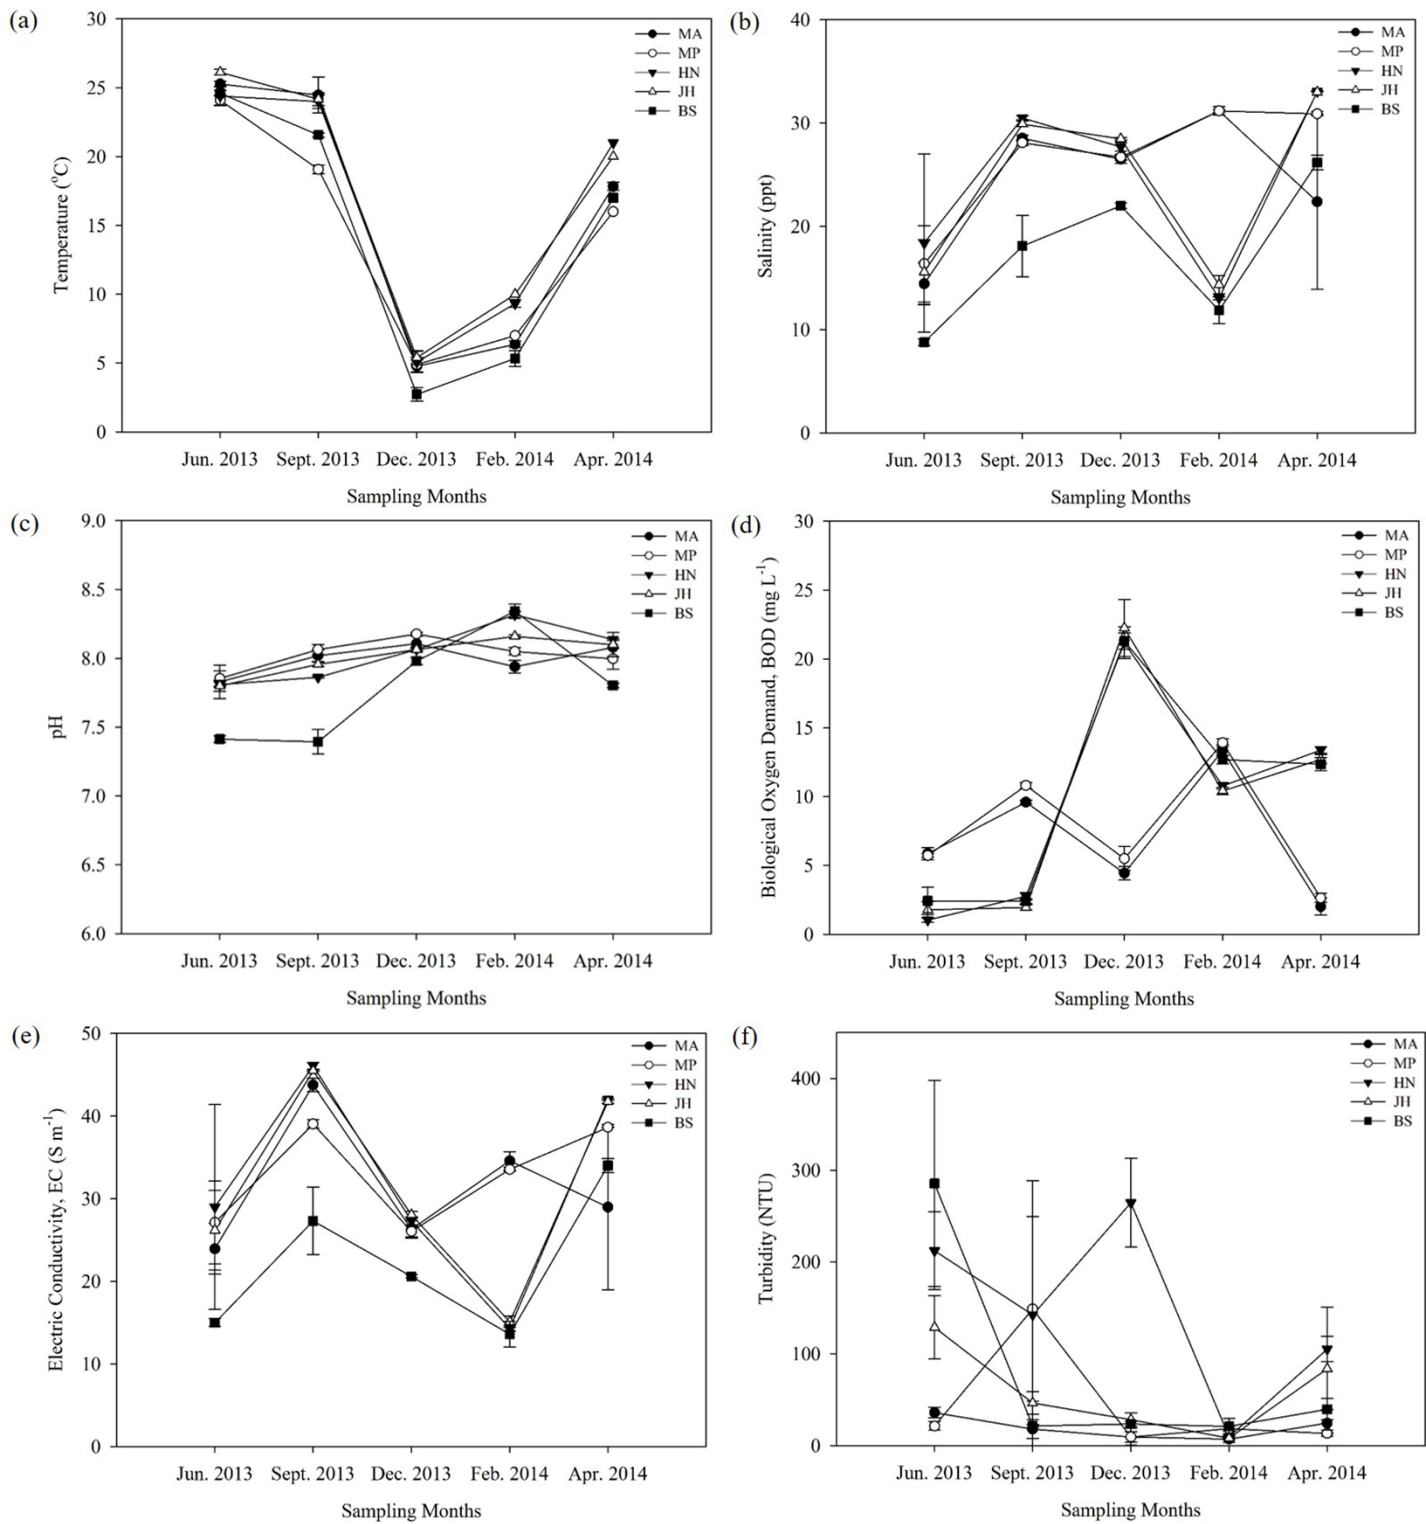

Figure S2.

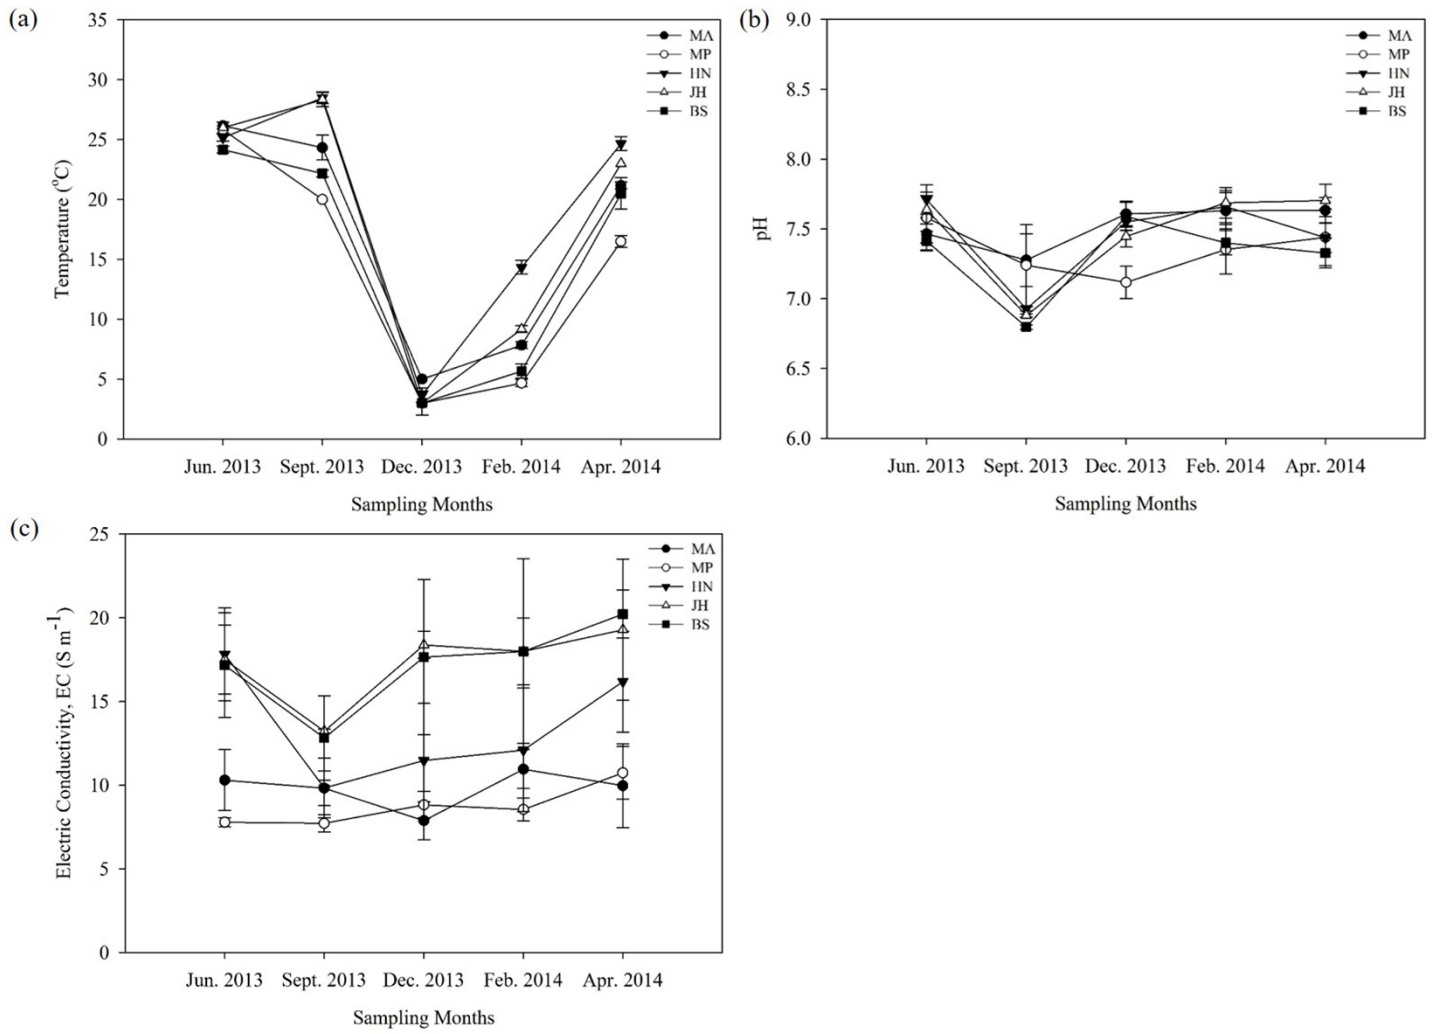

Supplement: AEM.02680-16_zam999117627s1.pdf [file AEM.02680-16_zam999117627s1.pdf]
